# Supplementary material for: Sarcomere Disassembly and Transfection Efficiency in Proliferating Human iPSC-Derived Cardiomyocytes
Source: J Cardiovasc Dev Dis. 2022 Jan 27;9(2):43. doi: 10.3390/jcdd9020043 (PMC8880351; doi:10.3390/jcdd9020043)
Supplement: Supplementary file 1 [file jcdd-09-00043-s001.zip]

Archive with 5 entries (5 files):
- jcdd-1425009-supplementary.pdf
- Video S1.mov
- Video S2.mov
- Video S3.mov
- Video S4.mov
